# Supplementary material for: A Direct Assessment of “Obesogenic”Built Environments: Challenges and Recommendations
Source: Hindawi journal article supplement (doi:10.1155/2011/161574), 2011-01-01
Supplement: f1 [file 161574.f1.zip]

Archive with 2 entries (2 files):
- Supplement table 1.docx
- Supplement Table 2.docx
