# Supplementary material for: A Direct Assessment of “Obesogenic”Built Environments: Challenges and Recommendations
Source: Hindawi journal article supplement (doi:10.1155/2011/161574), 2011-01-01
Supplement: f1 [file 161574.f1.zip › Supplement table 1.docx]

Supplement table 1: Pilot audit tool, based on Irvine-Minnesota Inventory, for direct assessment of built environment features

Postal code area:

Segment #

Intersection (beginning of the segment):

Intersection (end of segment):

Date:

Answer questions 1-11 based on this end of the segment intersection

| **Neighbourhood identification** | | | |
| --- | --- | --- | --- |
| 1. | Are there monuments or markers including neighbourhood entry signs that indicate that one is entering a special district area? | Yes=1  No=0 | |
| **Street crossing** | | | |
| 2. | Consider the places on the segment that are **intended** for pedestrians to cross the street. Are these places marked for pedestrian crossing? | | All=3; Some=2  None=0; NA=8 |
| 3. | What type of marking do the crosswalks have? Mark all that apply.  White painted lines  Colored painted lines  Zebra striping  Different road surface or paving (e.g. tiles, colored concrete, marble, etc)  Other | | Yes=1; No=0  Yes=1; No=0  Yes=1; No=0  Yes=1; No=0  Yes=1; No=0 |
| 4. | Are there curb cuts at all places where crossing is expected to occur? | | All=3; Some=2;  No=0; NA=8 |
| 5.  6.  7.  8.  9.  10.  11. | What type of traffic/pedestrian signal(s)/system(s) is/are provided? Mark all that apply.  Traffic signal  Stop sign  Yield sign  Pedestrian activated signal  Pedestrian crossing sign  Pedestrian overpass/underpass/bridge | | Yes=1; No=0  Yes=1; No=0  Yes=1; No=0  Yes=1; No=0  Yes=1; No=0  Yes=1; No=0 |

Answer questions 12-15 while standing at the beginning of the segment

| **Neighbourhood identification** | | |
| --- | --- | --- |
| 12. | Does the segment have banners that identify the neighbourhood? | Yes=1; No=0 |
| **Street characteristics** | | |
| 13. | Is this a pedestrianized street? | Yes=1; No=0 |
| 14. | Is the street a… | One way=1; Two way=2 |
| 15. | How many vehicle lanes are there for cars? (Include turning lanes) | Six or more=6; Five=5; Four=4; Three=3; Two=2; One=1; NA (no lanes for car travel)=8 |

Begin walking along segment to answer questions 16-113

| What types of land uses are present on this area? Mark all that apply. | | | |
| --- | --- | --- | --- |
| **Residential** | | | |
| 16. | Single family home-detached | | Yes=1; No=0 |
| 17. | Single family home/duplex – attached (2 units or fewer) | | Yes=1; No=0 |
| 18. | Town home/condo/apartment housing (3 units or more) | | Yes=1; No=0 |
| 19. | Mobile homes (includes manufactured homes) | | Yes=1; No=0 |
| 20. | Residential, others | | Yes=1; No=0 |
| **School** | | | |
| 21. | Elementary, middle or junior high school | Yes=1; No=0 | |
| 22. | High school | Yes=1; No=0 | |
| 23. | University or college (includes all types of building forms) | Yes=1; No=0 | |
| 24. | School, other | Yes=1; No=0 | |
| **Public space** | | | |
| 25. | Plaza/square/courtyard | Yes=1; No=0 | |
| 26. | Park | Yes=1; No=0 | |
| 27. | Playground | Yes=1; No=0 | |
| 28. | Playing fields | Yes=1; No=0 | |
| 29. | Garden | Yes=1; No=0 | |
| 30. | Landscaped open space | Yes=1; No=0 | |
| 31. | Public space, other | Yes=1; No=0 | |
| **Recreational/fitness** | | | |
| 32. | Gym/fitness centre (also includes yoga/pilates studios etc.) | Yes=1; No=0 | |
| 33. | Recreational, other | Yes=1; No=0 | |
| **Public/civic building** | | | |
| 34. | Community centre | Yes=1; No=0 | |
| 35. | Museum, auditorium, concert hall, theatre | Yes=1; No=0 | |
| 36. | Post office | Yes=1; No=0 | |
| 37. | Public building, other | Yes=1; No=0 | |
| **Institutional** | | | |
| 38. | Religious institution (church, temple, mosque, etc.) | Yes=1; No=0 | |
| 39. | Hospital, medical facility, health clinic | Yes=1; No=0 | |
| 40. | Institutional, other | Yes=1; No=0 | |
| **Commercial** | | | |
| 41. | Retail stores | Yes=1; No=0 | |
| 42. | Bank/financial service | Yes=1; No=0 | |
| 43. | Hotel/hospitality | Yes=1; No=0 | |
| 44. | Car dealership | Yes=1; No=0 | |
| 45. | Gas/service station | Yes=1; No=0 | |
| 46. | Commercial, other | Yes=1; No=0 | |
| **Office/service** | | | |
| 47. | Offices | Yes=1; No=0 | |
| 48. | Service facilities (includes insurance offices, funeral homes, dry cleaning, Laundromats, etc.) | Yes=1; No=0 | |
| 49. | Office/service, other | Yes=1; No=0 | |
| **Industrial/manufacturing** | | | |
| 50. | Light industrial (e.g. auto paint and auto body repair shops; i.e. clean industries) | Yes=1; No=0 | |
| 51. | Medium or heavy industrial (e.g. chemical plants, oil wells, etc.) | Yes=1; No=0 | |
| 52. | Industrial, other | Yes=1; No=0 | |

| 53. | How many of the buildings in this segment contain vertical-mixed use, that is, the building has different land uses on different floors of the building? | | Vertical mix present=1  No vertical mix=0 | | |
| --- | --- | --- | --- | --- | --- |
| Determine whether any of these distinctive retail types are present (focusing on the form of the building) | | | | | |
| 54. | Big box shops (includes super stores or warehouse stores) | Yes=1; No=0 | | | |
| 55. | Shopping mall | Yes=1; No=0 | | | |
| 56. | Strip mall/row of shops | Yes=1; No=0 | | | |
| 57. | Drive through | Yes=1; No=0 | | | |
| **Other land uses** | | | | | |
| Are these land uses are present on this segment? | | | | | |
| 58. | Bars/night clubs | Yes=1; No=0 | | | |
| 59. | Adult uses | Yes=1; No=0 | | | |
| 60. | Check cashing stores/pawn shops/bail bond stores | Yes=1; No=0 | | | |
| 61. | Liquor stores | Yes=1; No=0 | | | |
| Are the following gathering places present on this segment? | | | | | |
| 62. | Restaurants | Yes=1; No=0 | | | |
| 63. | Coffee shops | Yes=1; No=0 | | | |
| 64. | Libraries/book stores | Yes=1; No=0 | | | |
| 65. | Supermarket | Yes=1; No=0 | | | |
| 66. | Grocery Store | Yes=1; No=0 | | | |
| 67. | Convenience store | Yes=1; No=0 | | | |
| 68. | Bakery | Yes=1; No=0 | | | |
| 69. | Meat/butcher shop | Yes=1; No=0 | | | |
| 70. | Art or craft galleries | Yes=1; No=0 | | | |
| 71. | Movie theatre | Yes=1; No=0 | | | |
| 72. | Pharmacy | Yes=1; No=0 | | | |
| 73. | Video store | Yes=1; No=0 | | | |
| Are these nature features present on this segment? | | | | | |
| 74. | Open field/golf course | Yes=1; No=0 | | | |
| 75. | Lake/pond | Yes=1; No=0 | | | |
| 76. | Fountain/reflecting pool | Yes=1; No=0 | | | |
| 77. | Stream/river/canal/creek | Yes=1; No=0 | | | |
| 78. | Forest or woods | Yes=1; No=0 | | | |
| 79. | Mountain or hills | Yes=1; No=0 | | | |
| **Sidewalks** | | | | | |
| 80. | How many sides of the street have sidewalks? | Count 1 or 2; no sidewalks = 0 | | | |
| 81. | Is the sidewalk complete on one or both sides | Yes=1; No=0; NA=8 | | | |
| 82. | What is the condition or maintenance of the sidewalk? | Under repair=2; moderate or good=1; poor=0; NA=8 | | | |
| 83. | Is there a buffer (for example, parked cars, landscaped “buffer”, strip, etc.) between sidewalk and street? | Yes=1; no=0; NA=8 | | | |
| Determine how much of the sidewalk is covered by these features that provide protection from sun, rain, and/or snow. | | | | | |
| 84. | Arcades | Some/much of sidewalk covered=1; no/little covered=0 | | | |
| 85. | Awnings | Some/much=1; no/little=0 | | | |
| 86. | Other | Some/much=1; no/little=0 | | | |
| Sidewalk amenities | | | | | |
| 87. | Are there outdoor dining areas (e.g. cafes, outdoor tables at coffee shops or plazas, etc.) located on the segment? | Some/a lot=3; few=2; none=0 | | | |
|  | Indicate how many of each of the following street furniture/sidewalk amenities is/are present on the segment |  | | | |
| 88. | Benches (not a bus stop), chairs and/or ledges for sitting | Some/a lot=3; few=2; none=0 | | | |
| 89. | Heat lamps | Some/a lot=3; few=2; none=0 | | | |
| 90. | Bike racks | Some/a lot=3; few=2; none=0 | | | |
| 91. | Are there obvious public restrooms on this segment that are clearly open to the public? | Yes=1; No=0 | | | |
| 92. | How many bus stops is on the segment? | 3 or more=3; two=2; one=1; none=0 | | | |
| **Bicycle lanes** | | | | | |
| 93. | Is this block a designated bike route? | | | Yes=1; No=0 | |
| 94. | Are there bicycle lanes on the segment? | Yes=1; No=0 | | | |
| 95. | How are bicycle lanes demarcated? | On road, painted line/reflectors=3; on road physical separation=2; off road=1 | | | |
| **Steepness** | | | | | |
| 96. | How steep or hilly is the segment? Mark all that apply. | Steep slope=2; moderate slope=1; flat or gentle slope=0 | | | |
| **Street trees** | | | | | |
| 97. | How many trees are on this segment? (Do not include trees that are not on the public right of way; street trees are typically between the sidewalk and the street or if there is no sidewalk, trees usually line the street) | Some trees/trees along most or entire segment=1;  None/few trees=0 | | | |
| **Safety from traffic** | | | | | |
| 98. | Is there a marked mid-block crosswalk for pedestrians? | Yes=1; No=0 | | | |
| 99. | What is the posted speed limit on this segment? | Use number_____;  Not posted=8 | | | |
| 100. | Are there measures on this segment that could **slow down traffic**? Mark all that apply | Yes=1; No=0 | | | |
| 101. | Speed bump/speed hump/raised crosswalk; or dips (that are intended to slow down traffic) | Yes=1  No=0 | | | |
| 102. | Rumble strips or bumps (includes dots, reflectors, raised concrete strips, etc) | Yes=1  No=0 | | | |
| 103. | Curb bulb out/curb extension | Yes=1; No=0 | | | |
| 104. | Traffic circle/roundabout | Yes=1; No=0 | | | |
| 105. | Median | Yes=1; No=0 | | |
| 106. | Angled/On street parking (that runs along most or the entire segment-does not have to be on both sides of segment) | Yes=1; No=0 | | |
| 107. | Is there a **cul-de-sac or permanent street closing** on this segment? | Yes=1; No=0 | | |
| 108. | Are curbs present on the segment? | Mountable curbs=2  Nonmountable curbs=1  No curbs=0 | | |
| **Safety from crime** | | | | |
| 109. | Is there **outdoor lighting** on the segment? (Include lighting that is intended to light public paths and public spaces) | Yes=1;  No=0 | | |
| 110. | Are there abandoned buildings or lots on this segment? | Some/a lot=3; Few=2;  None=0; NA=8 | | |
| 111. | How much graffiti is apparent on this segment? | Some/a lot=3; Little=2; None=0 | | |
| 112. | How much **litter** is apparent on this segment? | Some/a lot=3; Little=2; None=0 | | |
| 113. | Block-watch signs present | Yes=1; No=0 | | |

**Other end of segment**

| **Neighbourhood identification** | | | |
| --- | --- | --- | --- |
| 114**.** | Are there monuments or markers including neighbourhood entry signs that indicate that one is entering a special district area? | Yes=1  No=0 | |
| **Street crossing** | | | |
| 115. | Consider the places on the segment that are **intended** for pedestrians to cross the street. Are these places marked for pedestrian crossing? | | All=3; Some=2  None=0; NA=8 |
| 116. | What type of marking do the crosswalks have? Mark all that apply.  White painted lines  Colored painted lines  Zebra striping  Different road surface or paving (e.g. tiles, colored concrete, marble, etc)  Other | | Yes=1; No=0  Yes=1; No=0  Yes=1; No=0  Yes=1; No=0  Yes=1; No=0 |
| 117. | Are there curb cuts at all places where crossing is expected to occur? | | All=3; Some=2;  No=0; NA=8 |
| 118.  119.  120.  121.  122.  123.  124. | What type of traffic/pedestrian signal(s)/system(s) is/are provided? Mark all that apply.  Traffic signal  Stop sign  Yield sign  Pedestrian activated signal  Pedestrian crossing sign  Pedestrian overpass/underpass/bridge | | Yes=1; No=0  Yes=1; No=0  Yes=1; No=0  Yes=1; No=0  Yes=1; No=0  Yes=1; No=0 |
| 125. | Consider the places on the segment that are **intended** for pedestrians to cross an alley. Does the sidewalk have curb cuts on each place designated to cross an alley? | | All=3; Some=2; None=0  NA=8 |

Alleys:

All: curb cuts present, or alley is leveled with the sidewalk.

Some: some curbs present

None: no curb cuts on the sidewalk for crossing alley.

NA: no alley on this segment/alley present but no sidewalk on that side
