# Supplementary material for: A Direct Assessment of “Obesogenic”Built Environments: Challenges and Recommendations
Source: Hindawi journal article supplement (doi:10.1155/2011/161574), 2011-01-01
Supplement: f1 [file 161574.f1.zip › Supplement Table 2.docx]

| Supplement table 2. Physical Activity and Nutrition Features audit tool – description of features | |
| --- | --- |
| Built Environment Feature | Description |
|  |  |
| Golf courses and country clubs | Includes golf courses, and country clubs that operate golf courses along with dining facilities and other recreational facilities. These establishments often provide food and beverage services, equipment rental services and golf instruction services. |
| Skiing facilities | Includes establishments primarily engaged in operating downhill and cross-country skiing areas, and operating equipment, such as ski lifts and tows. These establishments often provide food and beverage services, equipment rental services and ski instruction services. Included only if some part of the ski facility itself is present in the assessment area. |
| Fitness and recreational sports centres | Includes health clubs and similar facilities featuring exercise and other active physical fitness conditioning (e.g. Fitness World, community fitness centre), or recreational sports activities, (e.g. swimming, skating or racquet sports). Yoga and martial arts centres are included under this category, as well as private tennis courts. This category includes indoor and outdoor facilities, so long as they do not fit into one of the other Physical activity-related categories. Any facilities that are part of a private housing complex are not included in this category. |
| Bowling centres | These establishments primarily operate as bowling centres, but also often provide food and beverage services and may offer other entertainment facilities (e.g. billiards, arcade). |
| Public spaces (green spaces/parks/plazas/squares/ courtyards) | Includes public park areas designed for active and/or passive uses (e.g. sports, hiking, playing, sitting, picnics.) May include playground features, or it may only be a landscaped open space, but it should be clearly intended for viewing or use by the general public (e.g. landscaped area with benches and/or walking paths, wooded area with trails, etc.). Beaches, water-parks, wading pools, public courtyards and pedestrian-only plazas which serve the same purpose of active and/or passive recreational uses are also included. Vacant or undeveloped land or recreational/sports/leisure *facilities* are not included under this category; small privately landscaped areas which are intended for use by building residents/employees are also not included unless this area is of significant size and clearly accessible to the public. |
| Sports Fields | Baseball diamonds, soccer and football fields. Includes all surface types (grass, gravel and turf). Each baseball diamond is counted separately. If a soccer/football field shares the same area as a baseball field, only one point is recorded. Each soccer or football field is counted separately where they are clearly defined (divided by line, fence, path, etc.). Fields with multiple nets and no clear definition between them are counted as one. Also, if multiple baseball fences are present with no clear diamonds, count this as one field. |
| Bicycle Lanes | Bike lanes should be physically marked by painted lines and/or signage. |
| Public recreational courts | Includes courts or parks that have been paved/installed for specific recreational uses, such as basketball, hockey, tennis or volleyball courts, as well as facilities such as skateboard parks. Only those facilities free of charge and available to the public are included. Paid admittance facilities are defined as “Fitness and recreational sports centres”. |
| Outdoor skating rink | Includes skating facilities that are available free of charge to the public. If assessment is conducted during off-season, these are still designated as “Outdoor skating rink” if the information is known. Those available for a fee fit under the “Fitness and recreational sports centres” category. |
| Supermarket and grocery stores | Includes stores primarily engaged in retailing a broad line of food, such as canned, dry and frozen foods, fresh fruits and vegetables, fresh and prepared meats, fish, poultry, dairy products, baked products and snack foods. These establishments may also typically retail a range of non-food household products, such as household paper products, toiletries and non-prescription drugs. |
| Convenience stores/general store | Includes stores primarily engaged in retailing a limited line of convenience items that generally includes milk, bread, soft drinks, snacks, tobacco products, newspapers and magazines. These establishments may retail a limited line of canned goods, dairy products, fruits/vegetables, household paper and cleaning products, as well as alcoholic beverages, and provide related services, such as lottery ticket sales and video rental. |
| Meat or fish/seafood store/market store | Includes establishments specializing in fresh, frozen, cured, or marinated meats, poultry, fish and/or seafood. Delicatessens primarily engaged in retailing cured/dried/smoked meat (e.g. ham) are included. These establishments may also offer a *limited line* of grocery or specialty food items. |
| Fruit and vegetable store/market store | Includes establishments specializing in the sale of fresh fruits and vegetables. These may also offer a limited line of grocery or specialty food items. |
| Baked goods stores | Includes establishments primarily engaged in retailing baked goods (breads, buns, cakes, pastries, etc.) made on or off premises, and not intended for immediate consumption on premises. Cafes selling baked goods are classified under the “Limited-service restaurant” category. |
| Confectionary or nut stores | Includes establishments primarily engaged in retailing candy and other confections, nuts and popcorn not intended for immediate consumption on premises. |
| Beer, wine and liquor stores | Includes establishments primarily engaged in retailing packaged alcoholic beverages, (e.g. beer, wine and liquor) not intended for immediate consumption on premises. |
| Specialty food store | Includes establishments primarily engaged in retailing specialty food items (e.g. spices, dried goods, and/or imported, ethnic, gourmet or health food items) as long as they do not fall under any of the above categories. |
| Full-service restaurants | Includes establishments primarily engaged in providing food services to patrons who order and are served while seated, and pay after eating. These establishments may sell alcoholic beverages, provide take-out services, operate a bar or present live entertainment, in addition to serving food and beverages; their primary source of business, however, is food. |
| Limited-service restaurants  (cafés/fast food/pizza places/fast casual restaurants/buffets) | Includes establishments primarily engaged in providing food services to patrons who order or select items at a counter, food bar or cafeteria line (or order by telephone) and pay before eating. Food may be picked up at the counter, or brought to the table. Food and drink can be consumed on-premises, picked up for take-out, or delivered to the customer’s location. These establishments may offer a variety of food items, specialty snacks (e.g. baked goods, ice-cream) or non-alcoholic beverages (e.g. coffee, smoothies). A seating area may or may not be available. |
| Drinking places (alcoholic beverages) | Includes establishments primarily engaged in preparing and serving alcoholic beverages for immediate consumption (e.g. bars, pubs, lounges, taverns). These establishments may also provide limited food services and entertainment, but do not include facilities whose *primary* function is concert or dance venue. |
| Library | Includes facilities primarily engaged in maintaining collections and facilitating the use of such documents (regardless of its physical form and characteristics) as are required to meet the informational, research, educational or recreational needs of their users. |
| Community centre or hall | Includes facilities which exist for the purposes of community gatherings/events (meeting halls) and that do not fall under the above definition for “Fitness and recreational sports centres” or “Library”. City halls meant primarily for government meetings/officials and not readily accessible to the public are not included in this category, but community halls that may be intended primarily for a select population (e.g. Italian community centre) are included. Community centres offering continuing education courses or workshops also fall under this category. Outreach facilities which primarily offer outreach services are not included, even if small gatherings may occur in this space. |
| Place of worship/religious hall | Includes establishments for religious worship (e.g. church, mosque, temple); associated halls (e.g. church hall for community gatherings) do not need to be counted separately if they are located on the same premises. |
| Elementary and secondary schools | Includes establishments primarily engaged in providing academic courses that comprise a basic preparatory education, that is, kindergarten through grade 12. The associated publicly-accessible playgrounds/soccer fields/basketball courts present on school grounds are recorded as separate features. |
| University, college or technical school / CEGEP (Quebec, Canada) | Includes establishments primarily engaged in providing post-secondary academic courses or training, in which a certificate, diploma or degree is obtained upon completion. Only recognized postsecondary institutions (defined as “Public or private institution that has been given full authority to grant degrees, diplomas, and other credentials by a public or private act of the provincial/territorial legislature or through a government-mandated quality assurance mechanism.” [www.cicic.ca](http://www.cicic.ca)) are recorded.  Private learning centres (such as those providing extra help in math, English, etc.) are not included as part of the assessment, and  community centres primarily engaged in providing “continuing education” (i.e. individual courses not part of a certificate program, such as informal art or public speaking classes) are classified under the “Community centre and town hall” category. |
| Entertainment centre | Includes establishments primarily engaged in providing *interactive* entertainment for children and adults. This may include mini-golf, laser tag, amusement rides, arcades and/or go-carts, and they also often provide food and beverage services. |
| Education/art/nature centre | Includes establishments primarily engaged in providing exhibits or interactive education for children and adults, or *private* landscaped spaces (ones available to the public for a viewing fee) and animal observatories. Examples include science centres, art galleries, museums, private botanical gardens, zoos, or marine parks. These may also provide food and beverage services. |
| Mixed use centre | Includes centres which house more than one of the above facilities (e.g. community center and library contained in one building). Centres offering *primarily* fitness services with a limited selection of additional services are categorized as “Fitness and recreational sports centres” instead of Mixed use centre. |
| Sidewalks: | These are pathways (paved or gravel) adjacent to roads dedicated for the use of pedestrian travel. Paths created unintentionally by human wear-and-tear (e.g. paths created over time from trampled grass) are not included. Sidewalks spanning at least 90% of the segment are classified as ‘complete’. Sidewalks for a given segment can then be classified as: complete on both sides of street; complete on one side of street, incomplete/absent on other; incomplete on one side, incomplete/absent on other; or no sidewalk present on segment.  Pedestrian-only/limited-access roadways not serving as a sidewalk are classified under the “path” category. That is, if the pedestrian walkway is located more than approx. 5 meters away from the road, it would be classified as ‘path’ rather than ‘sidewalk’. |
| Paths | Includes pedestrian-only paths, pedestrian/bike mixed-use paths, or limited-access roadways (paved, gravel, or dirt) dedicated for the use of pedestrian travel. Paths created unintentionally by human wear-and-tear (e.g. paths created over time from trampled grass) are not included. Includes paths intended for recreational purposes as well as those that serve as a throughway connecting two streets, in particular shortcuts and paths providing pedestrian access to areas where vehicle access is blocked (e.g. pedestrian paths joining dead-end streets with adjacent streets). Paths providing building access (e.g. those leading to store entrances) are not captured, as pedestrian access to these areas is implied. |
| Shoulders on streets | Includes strips of asphalt or gravel directly adjacent to roads (i.e. present between the road and any grass/vegetation or sidewalk) that can be used for walking, usually where no sidewalk is present. This space may possibly be shared by cars (for parking), bikes and pedestrians, and is visibly separated from the main road by a road-line, a change in road material, etc. Only includes shoulders that are wider than approximately one meter. Designated on-road bicycle lanes are not included in this category.  Shoulders spanning at least 90% of the block are classified as ‘complete’. Shoulders are recorded where present under the following categories: shoulder complete on both sides of the street; shoulder complete on one side of street, incomplete/absent on other; or shoulder incomplete on one side, incomplete/absent on other. |
| Streetlights | Includes lighting that is intended to light public paths and public spaces, such as sidewalks, streets, and walkways, where public might travel. Only public street lighting - usually located on the buffer between the road and sidewalk - is recorded, while lighting installed by property owners is not. Streetlights located far from the sidewalk (e.g. those located on the meridian of a multi-lane highway) which would not effectively light the walking path are not included. If more than one lamp is attached to the same post, this is counted as one streetlight. |
| Barriers | Physical barriers (e.g. fences, hedges) preventing access to a road or section of road documented on the map, or from accessing a larger area (e.g. green areas) are recorded. |
